# Supplementary material for: Sex-specific genetic analysis indicates low correlation between demographic and genetic connectivity in the Scandinavian brown bear (Ursus arctos)
Source: PLOS journal article supplement (doi:10.1371/journal.pone.0180701), 2017-07-03
Supplement: S11 (10.1371/journal.pone.0180701.s011) [file journal.pone.0180701.s011]

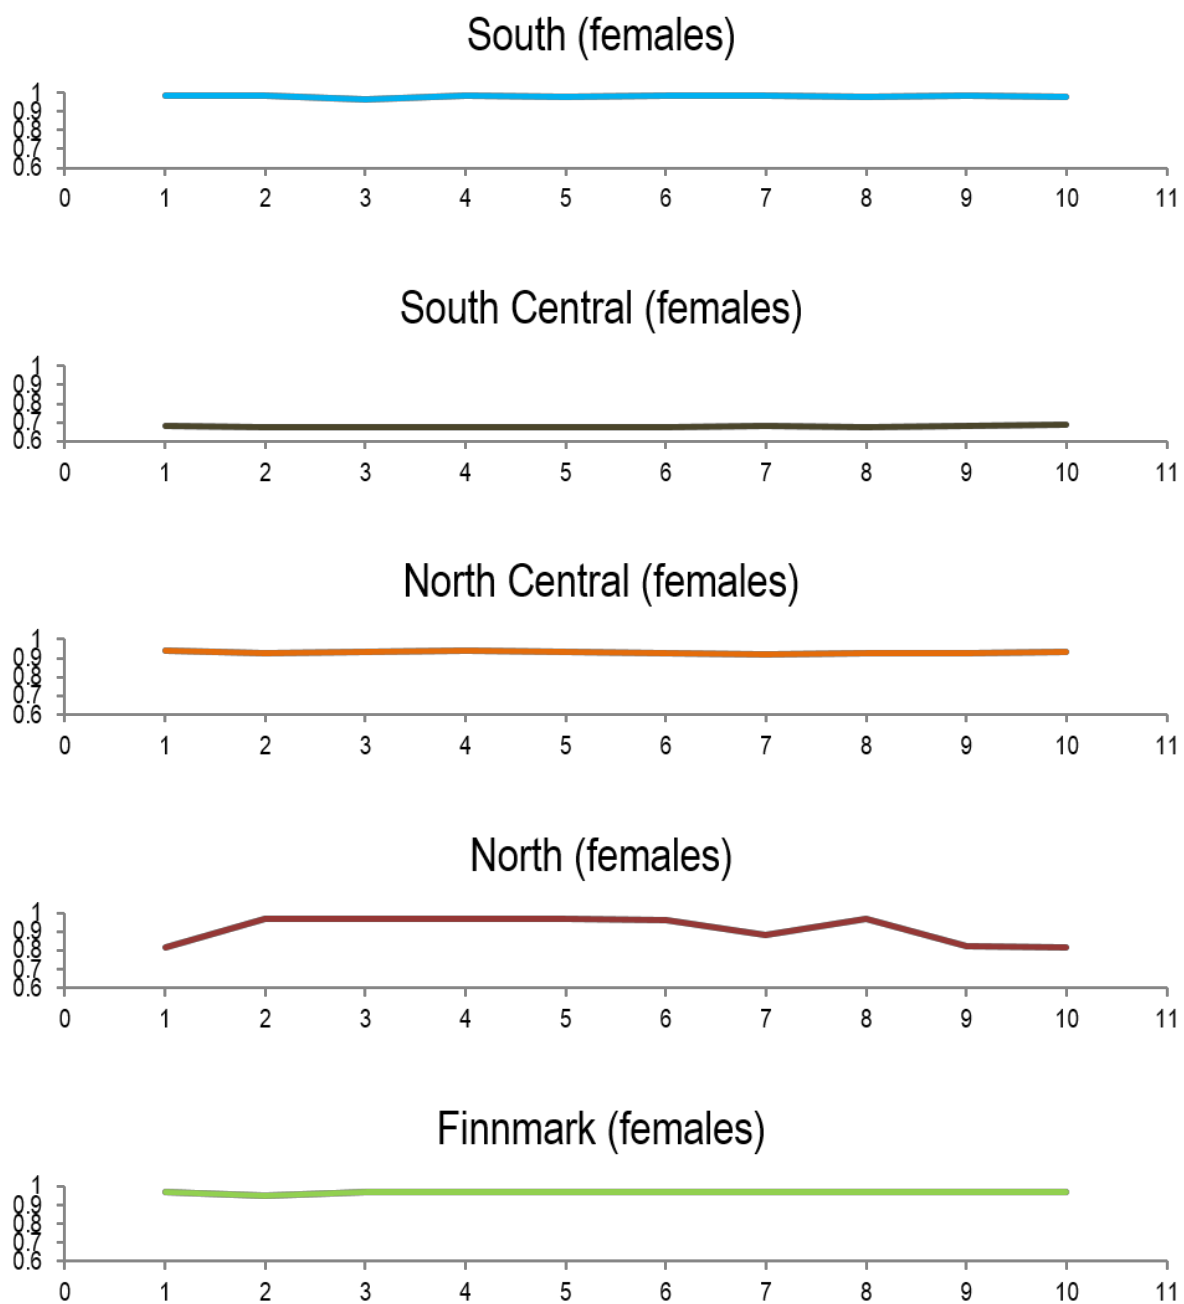

**S11 Fig. Consistency in the estimates of the nonmigrant proportion in ten independent runs of BAYESASS for female Scandinavian brown bears.**
